# Supplementary material for: Acute and Chronic Molecular Signatures and Associated Symptoms of Blast Exposure in Military Breachers
Source: PubMed Central journal article supplement — J Neurotrauma. 2020 May 5;37(10):1221–32. doi: 10.1089/neu.2019.6742 (PMC7232647; doi:10.1089/neu.2019.6742), 2020-05-05
Supplement: Suppl_FigS1.pdf [file Suppl_FigS1.pdf]

## Supplementary Data

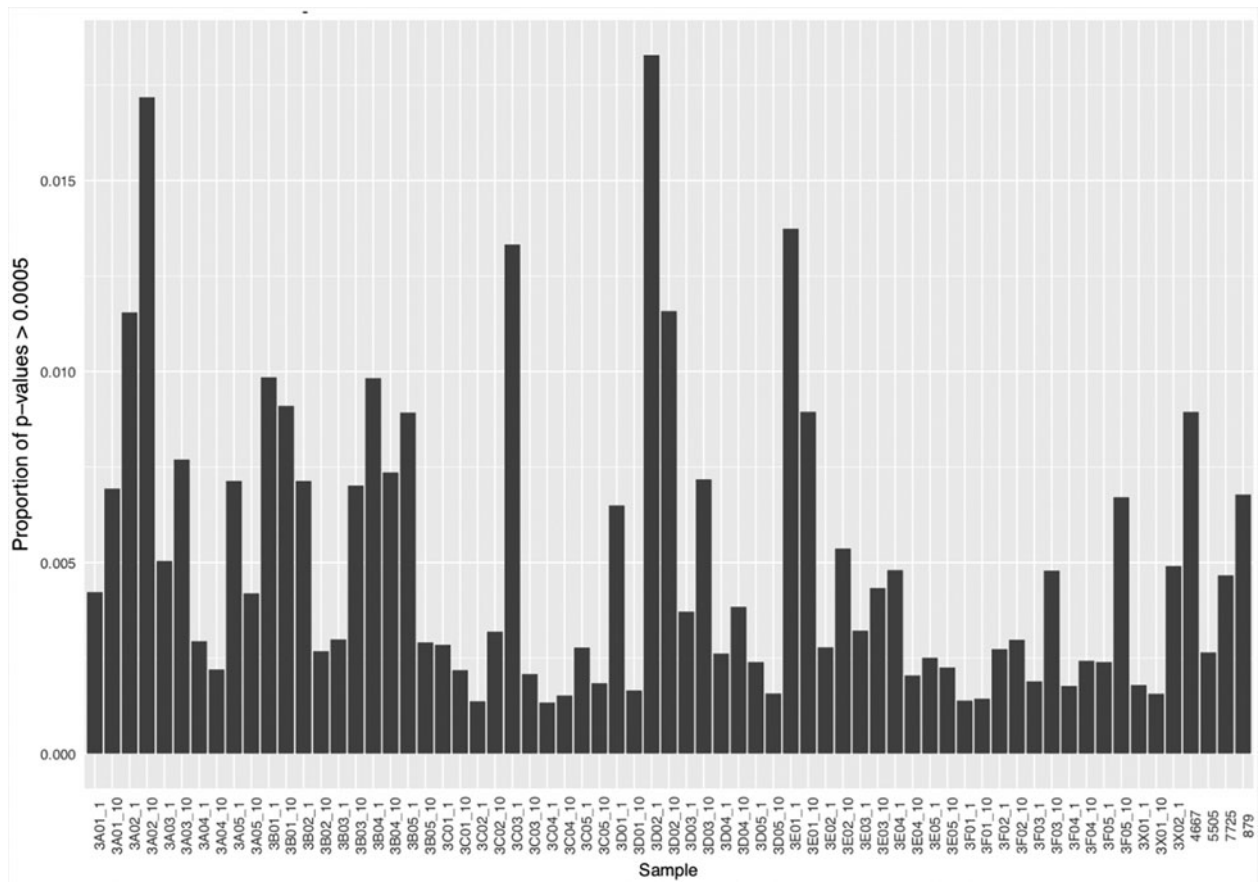

**SUPPLEMENTARY FIG. S1.** Quality control, detection  $p$  value. Showing the proportion of probes with poor quality ( $p > 0.0005$ ) probes for each biological sample. All samples had high-quality data, with at least 98% of probes passing criteria.
