# Supplementary material for: Acute and Chronic Molecular Signatures and Associated Symptoms of Blast Exposure in Military Breachers
Source: PubMed Central journal article supplement — J Neurotrauma. 2020 May 5;37(10):1221–32. doi: 10.1089/neu.2019.6742 (PMC7232647; doi:10.1089/neu.2019.6742), 2020-05-05
Supplement: Suppl_FigS2.pdf [file Suppl_FigS2.pdf]

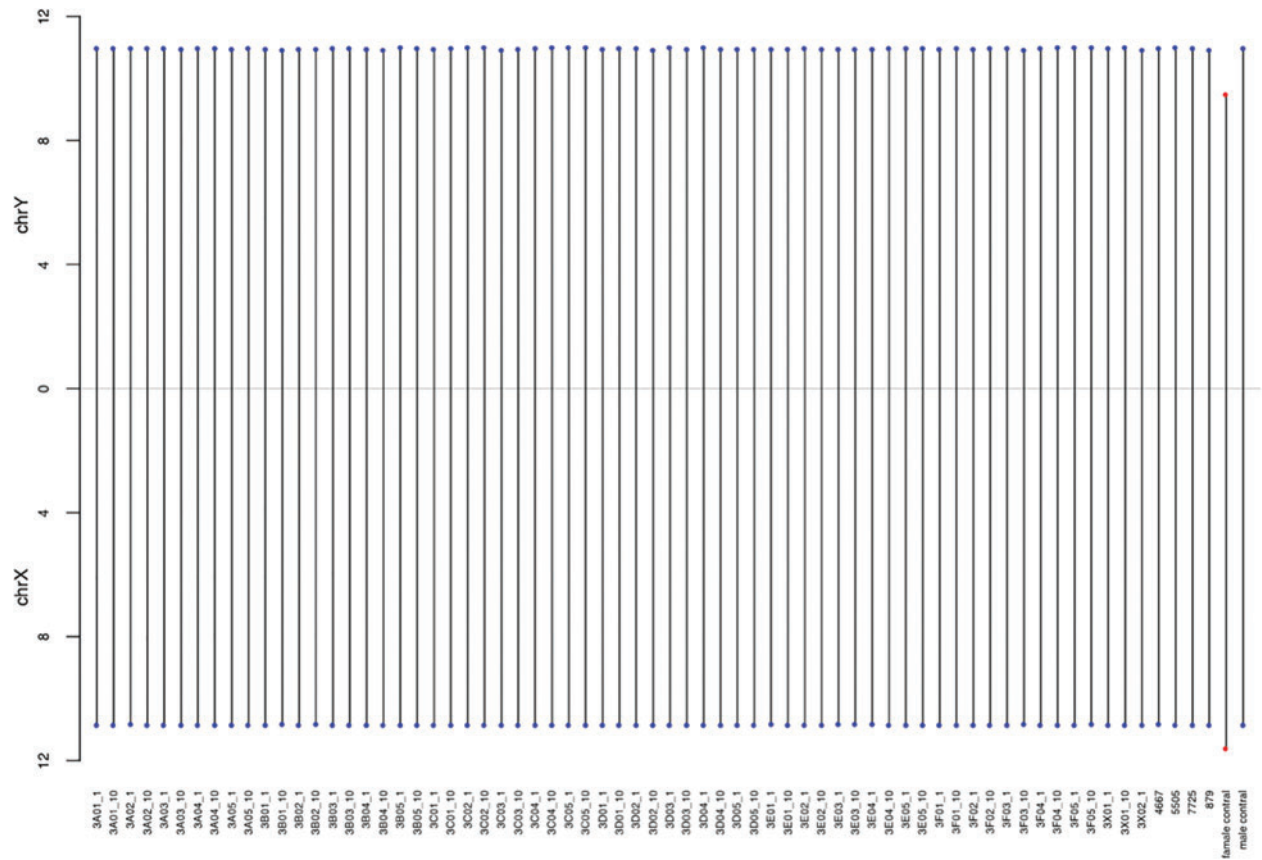

**SUPPLEMENTARY FIG. S2.** Quality control, sex prediction. Showing QC plot for sex prediction demonstrating consistency for predicted and reported sex, using chromosome X and chromosome Y median intensity. Known male and female reference samples were added as experimental controls. Blue circles are males and red circles are females.
