# Supplementary material for: Acute and Chronic Molecular Signatures and Associated Symptoms of Blast Exposure in Military Breachers
Source: PubMed Central journal article supplement — J Neurotrauma. 2020 May 5;37(10):1221–32. doi: 10.1089/neu.2019.6742 (PMC7232647; doi:10.1089/neu.2019.6742), 2020-05-05
Supplement: Suppl_FigS3.pdf [file Suppl_FigS3.pdf]

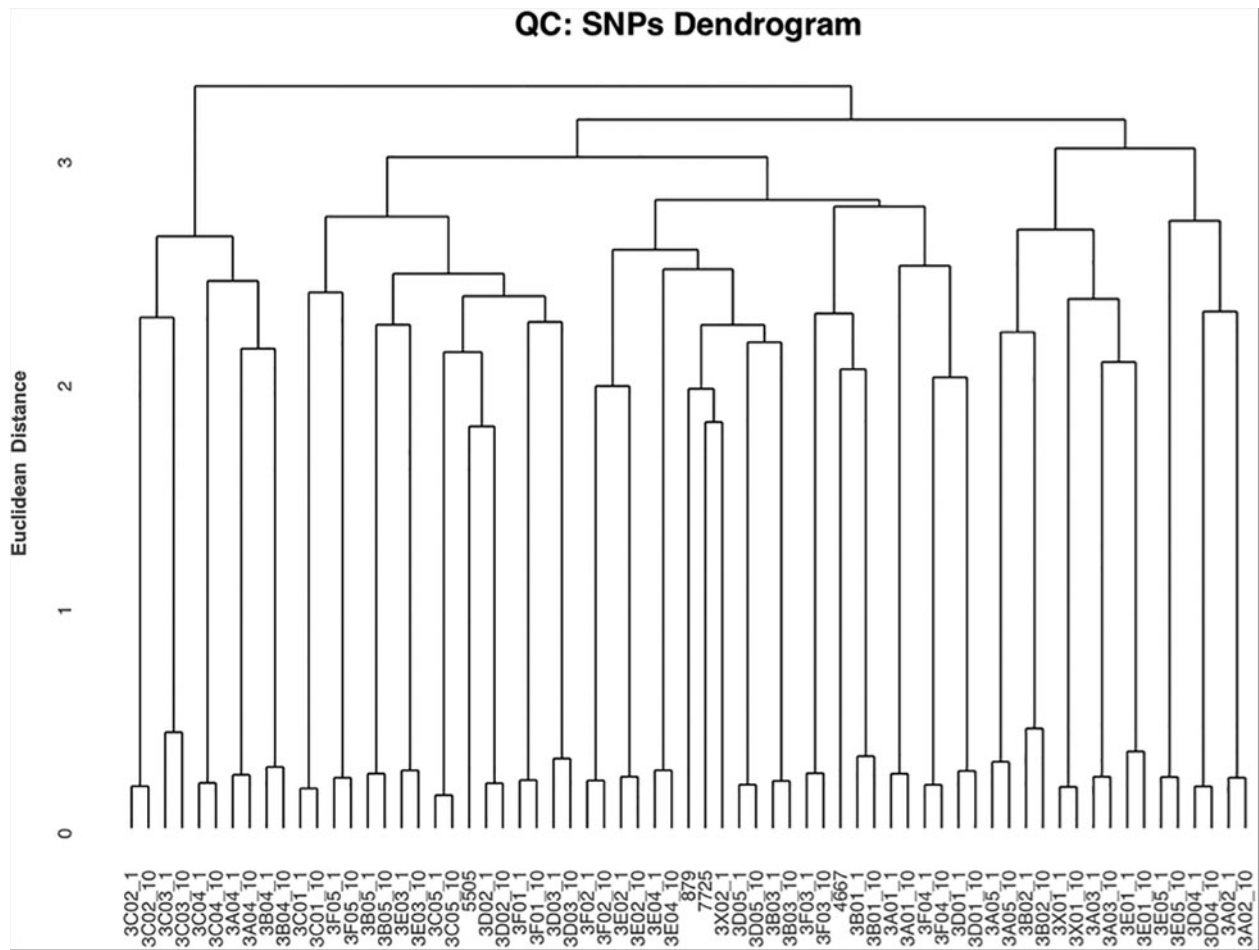

**SUPPLEMENTARY FIG. S3.** Quality control, genotype consistency check. QC of paired samples pre- and post-training exposure. Dendrogram showing clustering of individuals by genotypes derived from the 65 SNP probes for biological samples collected pre-/post-training. The y-axis shows Euclidean distance, and samples that show no clustering were those for which no post-training biological samples were available. SNP, single-nucleotide polymorphism.
