# Supplementary material for: Acute and Chronic Molecular Signatures and Associated Symptoms of Blast Exposure in Military Breachers
Source: PubMed Central journal article supplement — J Neurotrauma. 2020 May 5;37(10):1221–32. doi: 10.1089/neu.2019.6742 (PMC7232647; doi:10.1089/neu.2019.6742), 2020-05-05
Supplement: Suppl_FigS4.pdf [file Suppl_FigS4.pdf]

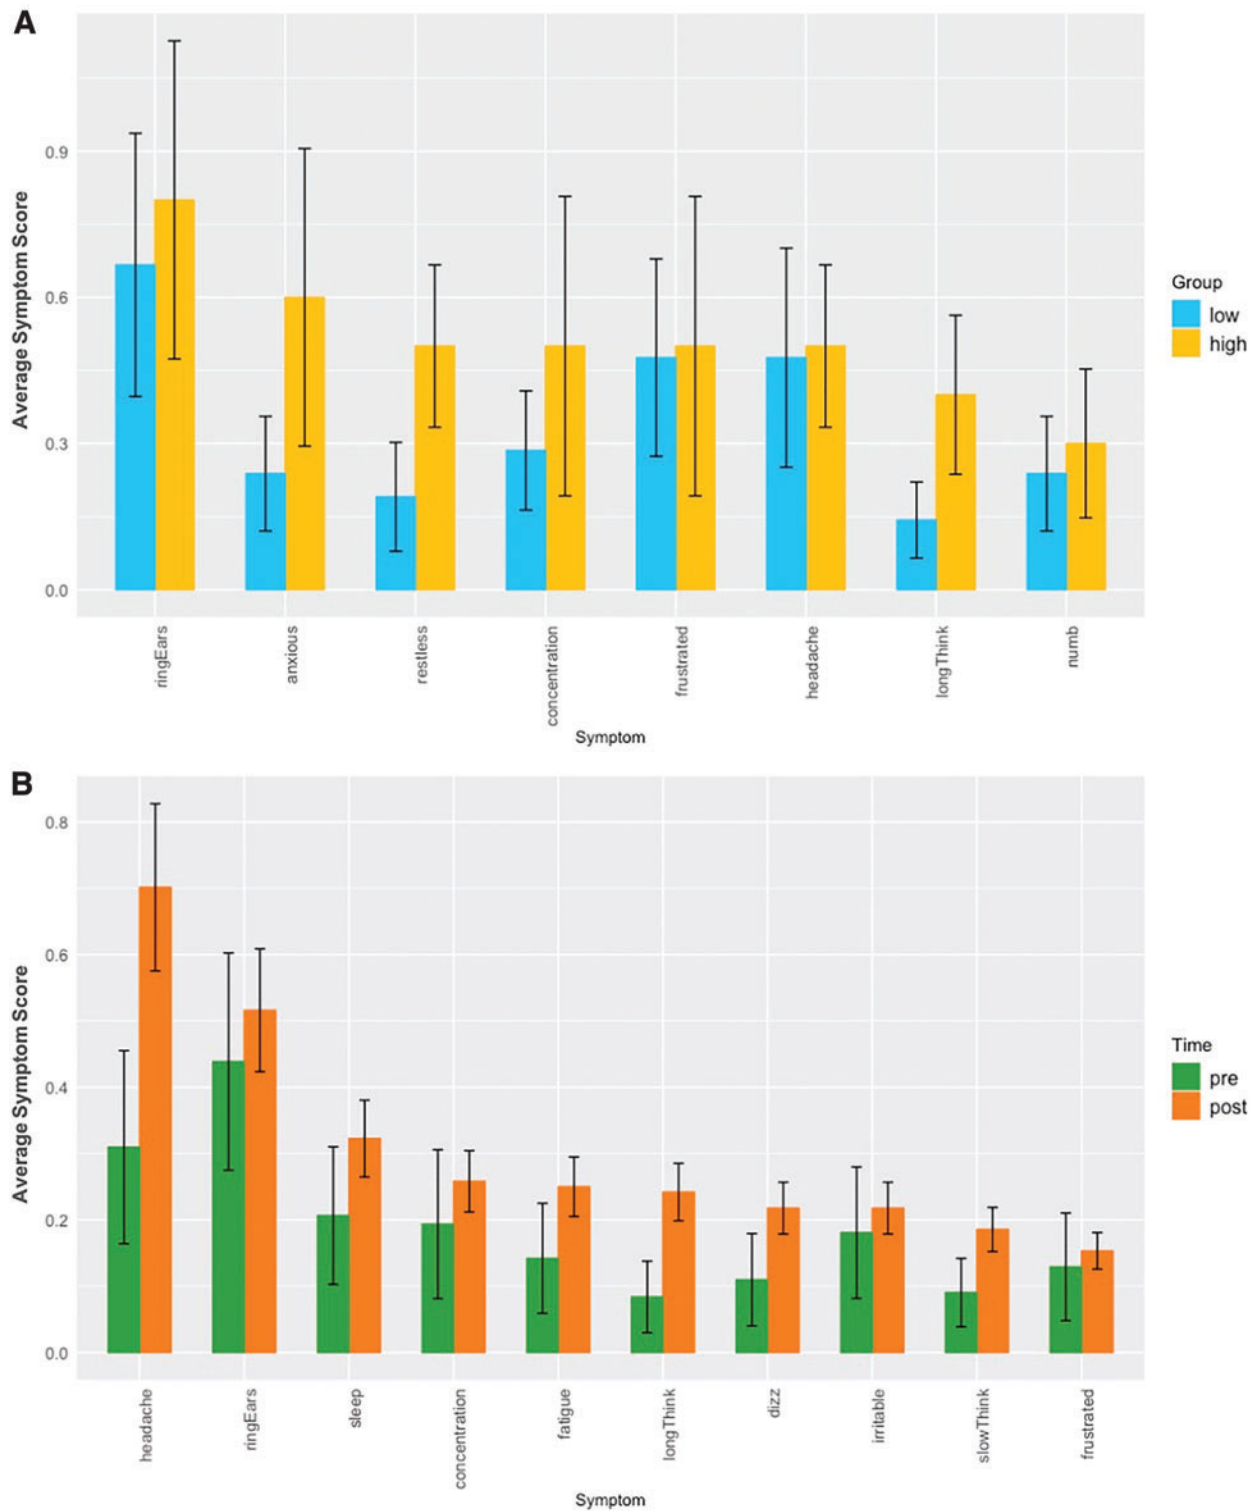

**SUPPLEMENTARY FIG. S4.** Average reported symptoms. **(A)** Average symptom scores reported at the start of the training for participants in low (blue) and high (yellow) cumulative blast-exposed groups, with tinnitus (ringing in the ears) being the highest endorsed symptom (endorsed by 11 participants). **(B)** Average symptom scores for all trainees pre-/post-blast exposure (green and orange, respectively), with headache being the highest reported symptom (endorsed by 18 participants).
