# Supplementary material for: Acute and Chronic Molecular Signatures and Associated Symptoms of Blast Exposure in Military Breachers
Source: PubMed Central journal article supplement — J Neurotrauma. 2020 May 5;37(10):1221–32. doi: 10.1089/neu.2019.6742 (PMC7232647; doi:10.1089/neu.2019.6742), 2020-05-05
Supplement: Suppl_FigS5.pdf [file Suppl_FigS5.pdf]

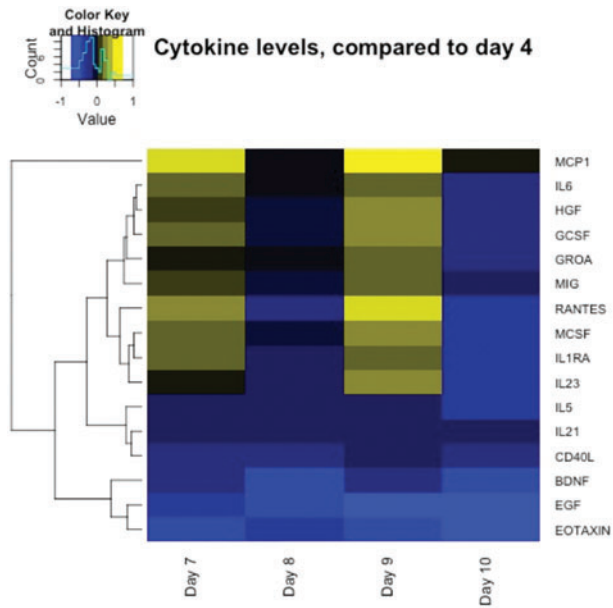

**SUPPLEMENTARY FIG. S5.** Heatmap showing extended cytokine panel with significant changes in cytokine level tracking with blast exposure (days 7 and 9) using training day 4 as the reference. BDNF, brain-derived neurotrophic factor; EGF, epidermal growth factor; GCSF, granulocyte colony-stimulating factor; GROA, growth-regulated oncogene- $\alpha$ ; HGF, hepatocyte growth factor; IL, interleukin; IL-1RA, interleukin-1 receptor agonist; MCP1, monocyte chemoattractant protein 1; MCSF, macrophage colony-stimulating factor; MIG, monokine inducible by interferon gamma; RANTES, regulated upon activation normal T-cell expressed and secreted.
